# Supplementary material for: Weekly Versus Daily Dipeptidyl Peptidase 4 Inhibitor Therapy for Type 2 Diabetes: Systematic Review and Meta-analysis
Source: Oxford University Press journal article supplement (doi:10.2337/dc17-2095), 2018-02-15

## Supplementary appendix

### **Weekly vs. daily dipeptidyl peptidase-4 inhibitor therapy for type 2 diabetes: Systematic review and meta-analysis**

Tomohide Yamada, Nobuhiro Shojima, Hisashi Noma, Toshimasa Yamauchi, Takashi Kadowaki

#### Contents

Supplementary Appendix 1. Protocol for the present systematic review

Supplementary Appendix 2. PRISMA checklist

Supplementary Appendix 3. Literature search and study selection

Supplementary Appendix 4. Characteristics of the trials investigated

Supplementary Appendix 5. Clinical outcomes of the trials investigated

Supplementary Appendix 6. Incidence of events in the trials investigated

Supplementary Appendix 7. Risk of bias

Supplementary Appendix 8. Meta-analysis comparing weekly DPP-4is with placebo for type 2 diabetes

Supplementary Appendix 9. Funnel plots and the results of Begg's test and Egger's test

## Supplementary Appendix 1. Protocol for systematic review

## Weekly vs. daily dipeptidyl peptidase-4 inhibitor therapy for type 2 diabetes: Systematic review and meta-analysis

| Information                                                                                                                                                                                                                                                                                                                                                                                                                                                | Topic                  | Date        | PRISMA-P Item* |
|------------------------------------------------------------------------------------------------------------------------------------------------------------------------------------------------------------------------------------------------------------------------------------------------------------------------------------------------------------------------------------------------------------------------------------------------------------|------------------------|-------------|----------------|
| <b>ADMINISTRATIVE INFORMATION</b>                                                                                                                                                                                                                                                                                                                                                                                                                          |                        |             |                |
| <b>Title</b>                                                                                                                                                                                                                                                                                                                                                                                                                                               |                        |             |                |
| Weekly vs. daily dipeptidyl peptidase-4 inhibitor therapy for type 2 diabetes: Systematic review and meta-analysis                                                                                                                                                                                                                                                                                                                                         | Identification         | August 2017 | 1a             |
| <b>Registration</b>                                                                                                                                                                                                                                                                                                                                                                                                                                        |                        |             |                |
| PROSPERO (CRD42017069004)                                                                                                                                                                                                                                                                                                                                                                                                                                  | -                      | August 2017 | 2              |
| <b>Authors</b>                                                                                                                                                                                                                                                                                                                                                                                                                                             |                        |             |                |
| Tomohide Yamada (bqx07367@yahoo.co.jp)                                                                                                                                                                                                                                                                                                                                                                                                                     | Contact                | August 2017 | 3a             |
| Hisashi Noma                                                                                                                                                                                                                                                                                                                                                                                                                                               |                        |             |                |
| Nobuhiro Shojima                                                                                                                                                                                                                                                                                                                                                                                                                                           |                        |             |                |
| Takashi Kadowaki                                                                                                                                                                                                                                                                                                                                                                                                                                           |                        |             |                |
| All Authors contributed to this protocol. TYamada is a guarantor of the review                                                                                                                                                                                                                                                                                                                                                                             | Contribution           |             | 3b             |
| <b>Amendments</b>                                                                                                                                                                                                                                                                                                                                                                                                                                          |                        |             |                |
| -                                                                                                                                                                                                                                                                                                                                                                                                                                                          | -                      | -           | 4              |
| <b>Support</b>                                                                                                                                                                                                                                                                                                                                                                                                                                             |                        |             |                |
| TY was funded by the Japan Diabetes Society, Japan Society for the Promotion of Science (16K20965), and Japan Foundation for Applied Enzymology.                                                                                                                                                                                                                                                                                                           | Sources                | August 2017 | 5a             |
| NA                                                                                                                                                                                                                                                                                                                                                                                                                                                         | Sponsor                |             | 5b             |
| The funding sources had no role in this study.                                                                                                                                                                                                                                                                                                                                                                                                             | Role of sponsor/funder |             | 5c             |
| <b>INTRODUCTION</b>                                                                                                                                                                                                                                                                                                                                                                                                                                        |                        |             |                |
| <b>Rationale</b>                                                                                                                                                                                                                                                                                                                                                                                                                                           |                        |             |                |
| Once-weekly dipeptidyl peptidase-4 inhibitors (weekly DPP-4is) were recently developed in addition to the once-daily agents, and weekly DPP-4is may improve compliance by reducing the burden of medication. Omarigliptin and trelagliptin are the weekly DPP4is currently available on the market in Japan. We performed a meta-analysis to assess the efficacy and safety of weekly DPP-4is compared with daily DPP-4is and placebo for type 2 diabetes. | -                      | August 2017 | 6              |
| <b>Objectives</b>                                                                                                                                                                                                                                                                                                                                                                                                                                          |                        |             |                |
| We performed a systematic review and meta-analysis to determine the efficacy and safety of weekly DPP-4 inhibitor therapy compared with placebo and daily DPP-4 inhibitors in type 2 diabetes.                                                                                                                                                                                                                                                             | -                      | August 2017 | 7              |
| <b>METHODS</b>                                                                                                                                                                                                                                                                                                                                                                                                                                             |                        |             |                |
| <b>Eligibility criteria</b>                                                                                                                                                                                                                                                                                                                                                                                                                                |                        |             |                |

## SUPPLEMENTARY DATA

|                                                                                                                                                                                                                                                                                                                                                                                                                                                                                                                                                                        |                         |                |     |
|------------------------------------------------------------------------------------------------------------------------------------------------------------------------------------------------------------------------------------------------------------------------------------------------------------------------------------------------------------------------------------------------------------------------------------------------------------------------------------------------------------------------------------------------------------------------|-------------------------|----------------|-----|
| Randomized trials that fulfilled the following criteria were eligible: (1) comparison of weekly DPP-4 inhibitor therapy with placebo or daily DPP-4 inhibitors for $\geq 12$ weeks in adult patients ( $\geq 18$ years old) with type 2 diabetes, and (2) reporting efficacy and safety outcomes of interest. Studies were excluded if other aspects of treatment were targeted, if the design was not double-blind (e.g., open-label or cross-over), or if the follow-up period was $< 12$ weeks. Studies of children and observational studies were also ineligible. | -                       | August 2017    | 8   |
| <b>Information sources</b>                                                                                                                                                                                                                                                                                                                                                                                                                                                                                                                                             |                         |                |     |
| We searched PubMed, the Cochrane library, and EMBASE for original reports of RCTs that compared weekly DPP-4 inhibitors for type 2 diabetes with placebo or daily DPP-4 inhibitors.                                                                                                                                                                                                                                                                                                                                                                                    | -                       | August 2017    | 9   |
| <b>Search Strategy</b>                                                                                                                                                                                                                                                                                                                                                                                                                                                                                                                                                 |                         |                |     |
| Medline (1946- 16 September, 2017 ) and Embase (1947- 16 September, 2017) on ProQuest Dialog (dipeptidyl peptidase inhibitor OR mk-3012 OR omarigliptin OR SYR-472 OR trelagliptin OR DPP) AND (randomized controlled trial OR controlled clinical trial OR randomized)<br>Cochrane library<br>(~Issue 9 of 12, September 2017)<br>'(dipeptidyl peptidase inhibitor OR mk-3012 OR omarigliptin OR SYR-472 OR trelagliptin OR DPP) AND (randomized controlled trial OR controlled clinical trial OR randomized) in Title, Abstract, Keywords in Trials'                 | -                       | September 2017 | 10  |
| <b>Study Records</b>                                                                                                                                                                                                                                                                                                                                                                                                                                                                                                                                                   |                         |                |     |
| Two authors (TY, NS) will independently perform the searches. Literature search results will be uploaded.                                                                                                                                                                                                                                                                                                                                                                                                                                                              | Data management         | August 2016    | 11a |
| Two authors (TY, NS) will independently screen titles/abstracts and obtain full reports for 1) reports meeting inclusion criteria; 2) those requiring further discussion. Any discrepancies will be resolved through discussion.                                                                                                                                                                                                                                                                                                                                       | Selection Process       | August 2017    | 11b |
| Extracted data will be independently (TY, NS) add into digital pre-defined forms (Excel).                                                                                                                                                                                                                                                                                                                                                                                                                                                                              | Data collection process | August 2017    | 11c |
| <b>Data Items</b>                                                                                                                                                                                                                                                                                                                                                                                                                                                                                                                                                      |                         |                |     |
| Efficacy outcomes were the changes from baseline of HbA1c, fasting plasma glucose, 2-h postmeal glucose, body weight, achieving HbA1c $< 7.0\%$ . Safety outcomes were the occurrence of hypoglycemic events, severe hypoglycemic events, pancreatitis, and diarrhea. Data were extracted according to the definitions used in each study.                                                                                                                                                                                                                             | -                       | August 2017    | 12  |
| <b>Outcomes and Prioritization</b>                                                                                                                                                                                                                                                                                                                                                                                                                                                                                                                                     |                         |                |     |
| The arm-specific mean difference from baseline and odds ratio (OR) were employed as measures of effect for continuous and dichotomous variables, respectively.                                                                                                                                                                                                                                                                                                                                                                                                         | -                       | August 2017    | 13  |
| <b>Risk of Bias in Individual Studies</b>                                                                                                                                                                                                                                                                                                                                                                                                                                                                                                                              |                         |                |     |
| We used the risk of trial bias assessment scheme recommended by the Cochrane Collaboration for assessment of study quality.                                                                                                                                                                                                                                                                                                                                                                                                                                            | -                       | August 2017    | 14  |
| <b>Data Synthesis</b>                                                                                                                                                                                                                                                                                                                                                                                                                                                                                                                                                  |                         |                |     |

## SUPPLEMENTARY DATA

|                                                                                                                                                                                                                                                                                                                                                                                                                                                                                                                                                                                                                                                                                                                                                                                                                                                                                                                                                                                                                                                                                                                                                                                                                                                                                                                                                                                                                                                                                                                                                                                                                                                                                                                                                                                                                               |   |             |       |
|-------------------------------------------------------------------------------------------------------------------------------------------------------------------------------------------------------------------------------------------------------------------------------------------------------------------------------------------------------------------------------------------------------------------------------------------------------------------------------------------------------------------------------------------------------------------------------------------------------------------------------------------------------------------------------------------------------------------------------------------------------------------------------------------------------------------------------------------------------------------------------------------------------------------------------------------------------------------------------------------------------------------------------------------------------------------------------------------------------------------------------------------------------------------------------------------------------------------------------------------------------------------------------------------------------------------------------------------------------------------------------------------------------------------------------------------------------------------------------------------------------------------------------------------------------------------------------------------------------------------------------------------------------------------------------------------------------------------------------------------------------------------------------------------------------------------------------|---|-------------|-------|
| <p><b>Meta-analysis:</b></p> <p>Meta-analysis was performed by a frequentist-based approach with a multivariate random effects model (White IR (2009) Multivariate random-effects meta-analysis. <i>Stata J</i> 9:40–56). Heterogeneity was assessed by the <math>I^2</math> statistic (0% to 40%: might not be important; 30% to 60%: may represent moderate heterogeneity; 50% to 90%: may represent substantial heterogeneity; 75% to 100%: considerable heterogeneity.) (Higgins JP, Thompson SG, Deeks JJ et al (2003) Measuring inconsistency in meta-analyses. <i>BMJ</i> 327(7414):557–560. Higgins J, Green S. <i>Cochrane Handbook for systematic reviews of interventions</i>. Version 5.1.0. Cochrane Collaboration, 2011. <a href="http://handbook.cochrane.org/">http://handbook.cochrane.org/</a>. (accessed 1 December 2016)) Summary effect sizes and their 95% confidence intervals were calculated by using the random effects model of DerSimonian and Laird. Studies lacking data on the standard deviation (or standard error) were excluded from analysis.</p> <p>Publication bias was estimated visually by drawing funnel plots, and also by performing Begg’s test and Egger’s weighted regression test. The arm-specific difference of the mean value from baseline and the odds ratio (OR) were employed as measures of effect for continuous and dichotomous variables, respectively. We added 0.5 if no events were reported in the treatment group of a study.</p> <p>All statistical analyses were performed with Stata V.14.0 software and <math>P &lt; 0.05</math> was considered to indicate significance. This research was carried out according to a predetermined protocol and followed the standard guidelines for conduct and reporting of systematic reviews and meta-analyses.</p> | - | August 2017 | 15a,b |
| Additional analyses: NA                                                                                                                                                                                                                                                                                                                                                                                                                                                                                                                                                                                                                                                                                                                                                                                                                                                                                                                                                                                                                                                                                                                                                                                                                                                                                                                                                                                                                                                                                                                                                                                                                                                                                                                                                                                                       | - | August 2017 | 15c   |
| Summary planned if quantitative synthesis not appropriate: NA                                                                                                                                                                                                                                                                                                                                                                                                                                                                                                                                                                                                                                                                                                                                                                                                                                                                                                                                                                                                                                                                                                                                                                                                                                                                                                                                                                                                                                                                                                                                                                                                                                                                                                                                                                 | - | August 2017 | 15d   |
| <b>Meta-bias(es)</b>                                                                                                                                                                                                                                                                                                                                                                                                                                                                                                                                                                                                                                                                                                                                                                                                                                                                                                                                                                                                                                                                                                                                                                                                                                                                                                                                                                                                                                                                                                                                                                                                                                                                                                                                                                                                          |   |             |       |
| Tables will show the availability of data for each study and outcome (selective reporting)                                                                                                                                                                                                                                                                                                                                                                                                                                                                                                                                                                                                                                                                                                                                                                                                                                                                                                                                                                                                                                                                                                                                                                                                                                                                                                                                                                                                                                                                                                                                                                                                                                                                                                                                    | - | August 2017 | 16    |
| <b>Confidence in cumulative evidence</b>                                                                                                                                                                                                                                                                                                                                                                                                                                                                                                                                                                                                                                                                                                                                                                                                                                                                                                                                                                                                                                                                                                                                                                                                                                                                                                                                                                                                                                                                                                                                                                                                                                                                                                                                                                                      |   |             |       |
| Results will be commented in view of study limitations and available evidence                                                                                                                                                                                                                                                                                                                                                                                                                                                                                                                                                                                                                                                                                                                                                                                                                                                                                                                                                                                                                                                                                                                                                                                                                                                                                                                                                                                                                                                                                                                                                                                                                                                                                                                                                 | - | August 2017 | 17    |

\* Shamseer L, Moher D, Clarke M, Ghersi D, Liberati A, Petticrew M, et al. PRISMA-P Group. Preferred reporting items for systematic review and meta-analysis protocols (PRISMA-P) 2015: elaboration and explanation. *BMJ*. 2015 Jan 2;349:g7647. doi: 10.1136/bmj.g7647



**Supplementary Appendix 2. PRISMA checklist**

| Section/topic                      | #  | Checklist item                                                                                                                                                                                                                                                                                              | Reported on page # |
|------------------------------------|----|-------------------------------------------------------------------------------------------------------------------------------------------------------------------------------------------------------------------------------------------------------------------------------------------------------------|--------------------|
| <b>TITLE</b>                       |    |                                                                                                                                                                                                                                                                                                             |                    |
| Title                              | 1  | Identify the report as a systematic review, meta-analysis, or both.                                                                                                                                                                                                                                         | 1                  |
| <b>ABSTRACT</b>                    |    |                                                                                                                                                                                                                                                                                                             |                    |
| Structured summary                 | 2  | Provide a structured summary including, as applicable: background; objectives; data sources; study eligibility criteria, participants, and interventions; study appraisal and synthesis methods; results; limitations; conclusions and implications of key findings; systematic review registration number. | -                  |
| <b>INTRODUCTION</b>                |    |                                                                                                                                                                                                                                                                                                             |                    |
| Rationale                          | 3  | Describe the rationale for the review in the context of what is already known.                                                                                                                                                                                                                              | 2                  |
| Objectives                         | 4  | Provide an explicit statement of questions being addressed with reference to participants, interventions, comparisons, outcomes, and study design (PICOS).                                                                                                                                                  | 2                  |
| <b>METHODS</b>                     |    |                                                                                                                                                                                                                                                                                                             |                    |
| Protocol and registration          | 5  | Indicate if a review protocol exists, if and where it can be accessed (e.g., Web address), and, if available, provide registration information including registration number.                                                                                                                               | Appendix 1         |
| Eligibility criteria               | 6  | Specify study characteristics (e.g., PICOS, length of follow-up) and report characteristics (e.g., years considered, language, publication status) used as criteria for eligibility, giving rationale.                                                                                                      | 2, Appendix 1      |
| Information sources                | 7  | Describe all information sources (e.g., databases with dates of coverage, contact with study authors to identify additional studies) in the search and date last searched.                                                                                                                                  | 2, Appendix 1      |
| Search                             | 8  | Present full electronic search strategy for at least one database, including any limits used, such that it could be repeated.                                                                                                                                                                               | 2, Appendix 1      |
| Study selection                    | 9  | State the process for selecting studies (i.e., screening, eligibility, included in systematic review, and, if applicable, included in the meta-analysis).                                                                                                                                                   | 2, Appendix 1      |
| Data collection process            | 10 | Describe method of data extraction from reports (e.g., piloted forms, independently, in duplicate) and any processes for obtaining and confirming data from investigators.                                                                                                                                  | 2, Appendix 1      |
| Data items                         | 11 | List and define all variables for which data were sought (e.g., PICOS, funding sources) and any assumptions and simplifications made.                                                                                                                                                                       | 2, Appendix 1      |
| Risk of bias in individual studies | 12 | Describe methods used for assessing risk of bias of individual studies (including specification of whether this was done at the study or outcome level), and how this information is to be used in any data synthesis.                                                                                      | 2, Appendix 1      |
| Summary measures                   | 13 | State the principal summary measures (e.g., risk ratio, difference in means).                                                                                                                                                                                                                               | Appendix 1         |
| Synthesis of results               | 14 | Describe the methods of handling data and combining results of studies, if done, including measures of consistency (e.g., $I^2$ ) for each meta-analysis.                                                                                                                                                   | Appendix 1         |

| Section/topic | # | Checklist item | Reported on page # |
|---------------|---|----------------|--------------------|
|---------------|---|----------------|--------------------|

SUPPLEMENTARY DATA

**Supplementary Appendix 2. PRISMA checklist**

|                               |    |                                                                                                                                                                                                          |                   |
|-------------------------------|----|----------------------------------------------------------------------------------------------------------------------------------------------------------------------------------------------------------|-------------------|
| Risk of bias across studies   | 15 | Specify any assessment of risk of bias that may affect the cumulative evidence (e.g., publication bias, selective reporting within studies).                                                             | 2, Appendix 1     |
| Additional analyses           | 16 | Describe methods of additional analyses (e.g., sensitivity or subgroup analyses, meta-regression), if done, indicating which were pre-specified.                                                         | 2, Appendix 1     |
| <b>RESULTS</b>                |    |                                                                                                                                                                                                          |                   |
| Study selection               | 17 | Give numbers of studies screened, assessed for eligibility, and included in the review, with reasons for exclusions at each stage, ideally with a flow diagram.                                          | 3, Appendix 3     |
| Study characteristics         | 18 | For each study, present characteristics for which data were extracted (e.g., study size, PICOS, follow-up period) and provide the citations.                                                             | 3, Appendix 4-7   |
| Risk of bias within studies   | 19 | Present data on risk of bias of each study and, if available, any outcome level assessment (see item 12).                                                                                                | 3, Appendix 4-7   |
| Results of individual studies | 20 | For all outcomes considered (benefits or harms), present, for each study: (a) simple summary data for each intervention group (b) effect estimates and confidence intervals, ideally with a forest plot. | 3-4, Appendix 4-7 |
| Synthesis of results          | 21 | Present results of each meta-analysis done, including confidence intervals and measures of consistency.                                                                                                  | 3-4, Figure 1, 8  |
| Risk of bias across studies   | 22 | Present results of any assessment of risk of bias across studies (see Item 15).                                                                                                                          | 3, Appendix 8, 9  |
| Additional analysis           | 23 | Give results of additional analyses, if done (e.g., sensitivity or subgroup analyses, meta-regression [see Item 16]).                                                                                    | -                 |
| <b>DISCUSSION</b>             |    |                                                                                                                                                                                                          |                   |
| Summary of evidence           | 24 | Summarize the main findings including the strength of evidence for each main outcome; consider their relevance to key groups (e.g., healthcare providers, users, and policy makers).                     | 3                 |
| Limitations                   | 25 | Discuss limitations at study and outcome level (e.g., risk of bias), and at review-level (e.g., incomplete retrieval of identified research, reporting bias).                                            | 3                 |
| Conclusions                   | 26 | Provide a general interpretation of the results in the context of other evidence, and implications for future research.                                                                                  | 3                 |
| <b>FUNDING</b>                |    |                                                                                                                                                                                                          |                   |
| Funding                       | 27 | Describe sources of funding for the systematic review and other support (e.g., supply of data); role of funders for the systematic review.                                                               | 4                 |

From: Moher D, Liberati A, Tetzlaff J, Altman DG, The PRISMA Group (2009). Preferred Reporting Items for Systematic Reviews and Meta-Analyses: The PRISMA Statement. PLoS Med 6(6): e1000097. doi:10.1371/journal.pmed1000097

For more information, visit: [www.prisma-statement.org](http://www.prisma-statement.org).

### Supplementary Appendix 3. Literature search and study selection

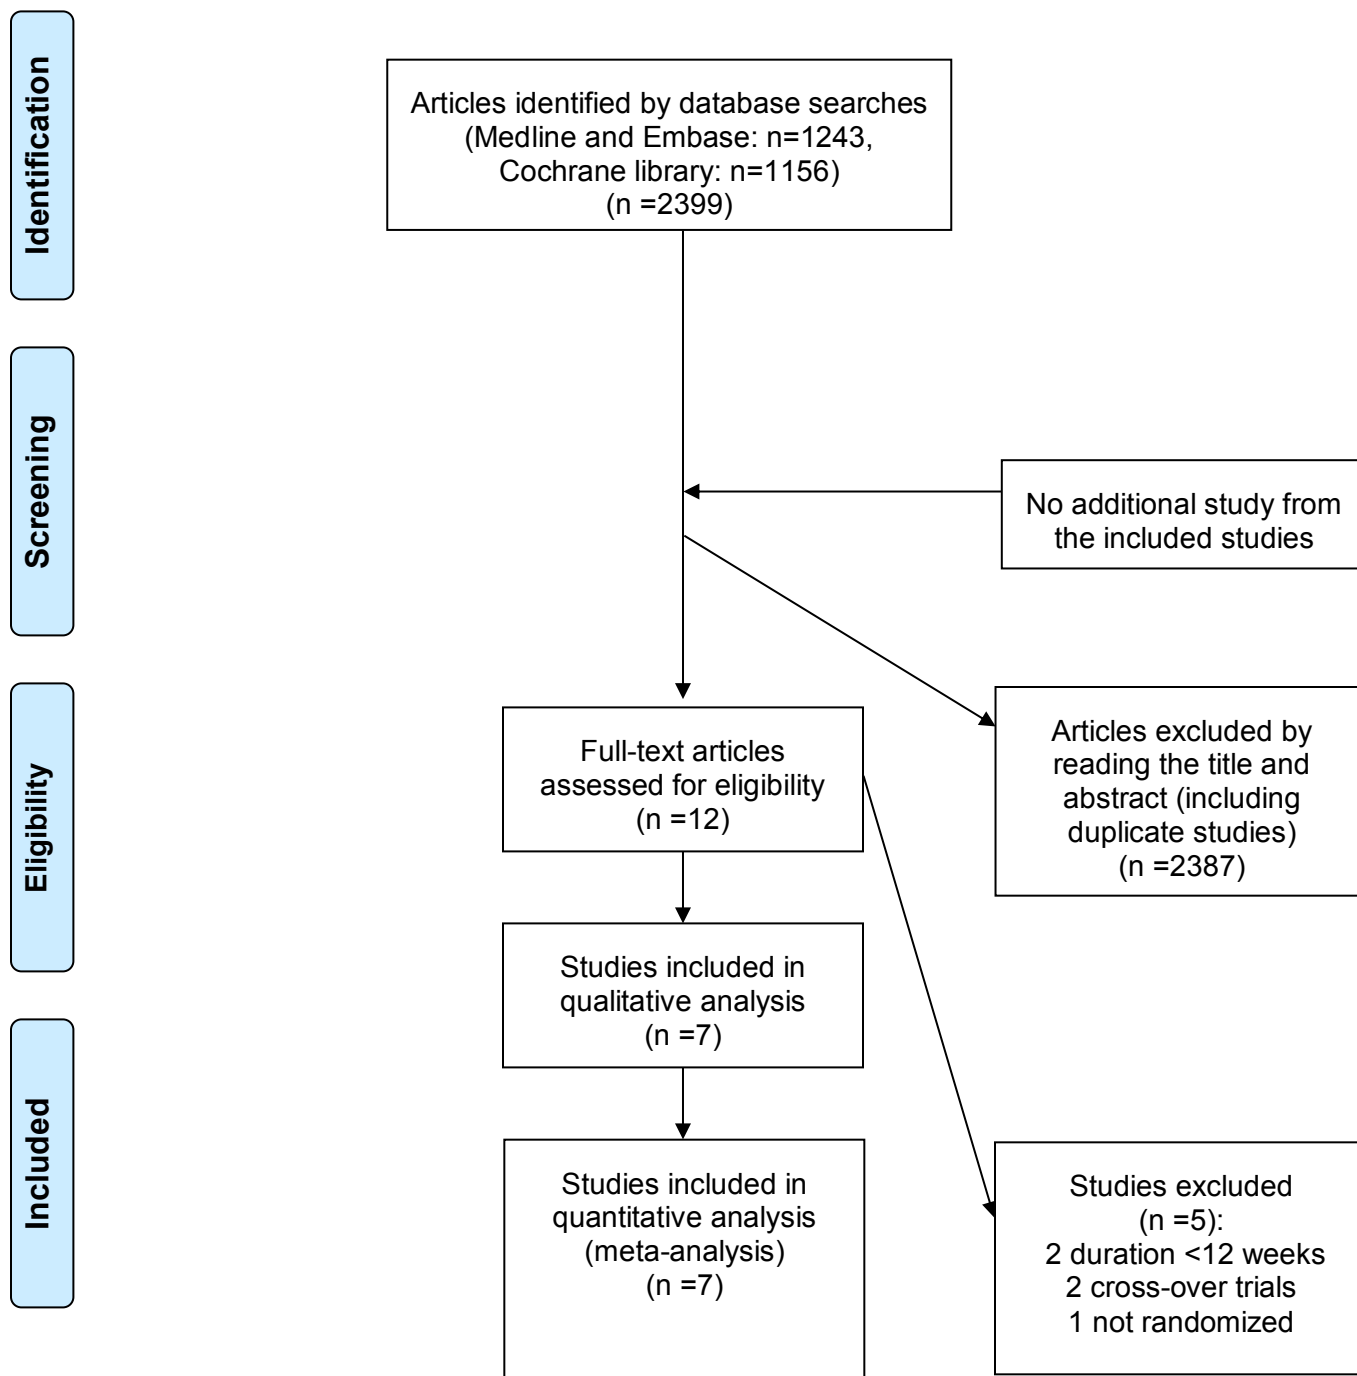

**Supplementary Appendix 4.** Characteristics of the trials investigated

| Author, year        | Sample size,<br>n | Study duration,<br>weeks | Treatment, mg/day                                                   | Men, % | Age, y | Duration<br>of<br>DM, y | HbA1c, % | BMI,<br>kg/m <sup>2</sup> | BW, kg | FPG,<br>mmol/l | 2hr<br>PPG,<br>mmol/l |
|---------------------|-------------------|--------------------------|---------------------------------------------------------------------|--------|--------|-------------------------|----------|---------------------------|--------|----------------|-----------------------|
| Shanker 2017 (1)    | 402               | 24                       | OMA 25, Placebo                                                     | 51     | 57     | 7.8                     | 8.1      | 32.5                      | 91.0   | 9.3            | 13.2                  |
| Gantz 2017 (2)      | 414               | 24                       | OMA 25, SITA50, Placebo                                             | 67     | 60     | 7.8                     | 8.0      | 25                        | 66.7   | 8.9            | 13.5                  |
| Chacra 2017 (3)     | 213               | 24                       | OMA 25, Placebo                                                     | 62     | 65     | 15.0                    | 8.3      | 30.1                      | 82.1   | 9.5            | NA                    |
| Goldenberg 2016 (4) | 642               | 24                       | OMA 25, SITA100                                                     | 51     | 58     | 7.3                     | 7.5      | 32                        | 89.5   | 8.7            | NA                    |
| Sheu 2015 (5)       | 685               | 12                       | OMA 0.25, OMA 1.0, OMA<br>3.0, OMA 10, OMA 25,<br>Placebo           | 57     | 55     | 5.4                     | 8.0      | 29.8                      | 82.3   | 9.5            | 13.1                  |
| Inagaki 2015 (6)    | 243               | 24                       | TRELA 100, ALO 25,<br>Placebo                                       | 77     | 60     | 7.0                     | 7.8      | 24.9                      | 67.9   | 9.1            | 13.6                  |
| Inagaki 2014 (7)    | 321               | 12                       | TRELA 12.5, TRELA 25,<br>TRELA 50, TRELA 100,<br>TRELA 200, Placebo | 60     | 60     | 6.5                     | 8.1      | 25.4                      | NA     | 9.1            | 14.1                  |

DM; diabetes mellitus, BMI; body mass index, BW; body weight, FPG; fasting plasma glucose, 2hr PPG; 2-hour postprandial glucose, OMA; omarigliptin, TRELA; trelagliptin, SITA; sitagliptin, ALO; alogliptin, NA; not available

## SUPPLEMENTARY DATA

### Reference

1. Shankar RR, Inzucchi SE, Scarabello V, Gantz I, Kaufman KD, Lai E, Ceesay P, Suryawanshi S, Engel SS. A randomized clinical trial evaluating the efficacy and safety of the once-weekly dipeptidyl peptidase-4 inhibitor omarigliptin in patients with type 2 diabetes inadequately controlled on metformin monotherapy. *Curr Med Res Opin.* 2017 Oct;33(10):1853-1860. doi: 10.1080/03007995.2017.1335637. Epub 2017 Jun 23. PubMed PMID: 28547998.
2. Gantz I, Okamoto T, Ito Y, Okuyama K, O'Neill EA, Kaufman KD, Engel SS, Lai E; and the Omarigliptin Study 020 Group. A randomized, placebo- and sitagliptin-controlled trial of the safety and efficacy of omarigliptin, a once-weekly dipeptidyl peptidase-4 inhibitor, in Japanese patients with type 2 diabetes. *Diabetes Obes Metab.* 2017 Apr 27. doi: 10.1111/dom.12988. [Epub ahead of print] PMID: 28449368.
3. Chacra A, Gantz I, Mendizabal G, Durlach L, O'Neill EA, Zimmer Z, Suryawanshi S, Engel SS, Lai E. A randomised, double-blind, trial of the safety and efficacy of omarigliptin (a once-weekly DPP-4 inhibitor) in subjects with type 2 diabetes and renal impairment. *Int J Clin Pract.* 2017 Jun;71(6). doi: 10.1111/ijcp.12955. Epub 2017 Apr 27. PMID: 28449320.
4. Goldenberg R, Gantz I, Andryuk PJ, O'Neill EA, Kaufman KD, Lai E, Wang YN, Suryawanshi S, Engel SS. Randomized clinical trial comparing the efficacy and safety of treatment with the once-weekly dipeptidyl peptidase-4 (DPP-4) inhibitor omarigliptin or the once-daily DPP-4 inhibitor sitagliptin in patients with type 2 diabetes inadequately controlled on metformin monotherapy. *Diabetes Obes Metab.* 2017 Mar;19(3):394-400. doi: 10.1111/dom.12832. Epub 2017 Jan 17. PMID: 28093853  
PMCID: PMC5347923
5. Sheu WH, Gantz I, Chen M, Suryawanshi S, Mirza A, Goldstein BJ, Kaufman KD, Engel SS. Safety and Efficacy of Omarigliptin (MK-3102), a Novel Once-Weekly DPP-4 Inhibitor for the Treatment of Patients With Type 2 Diabetes. *Diabetes Care.* 2015 Nov;38(11):2106-14. doi: 10.2337/dc15-0109. Epub 2015 Aug 26. PMID: 26310692.
6. Inagaki N, Onouchi H, Maezawa H, Kuroda S, Kaku K. Once-weekly trelagliptin versus daily alogliptin in Japanese patients with type 2 diabetes: a randomised, double-blind, phase 3, non-inferiority study. *Lancet Diabetes Endocrinol.* 2015 Mar;3(3):191-7. doi: 10.1016/S2213-8587(14)70251-7. Epub 2015 Jan 19. PMID: 25609193
7. Inagaki N, Onouchi H, Sano H, Funao N, Kuroda S, Kaku K. SYR-472, a novel once-weekly dipeptidyl peptidase-4 (DPP-4) inhibitor, in type 2 diabetes mellitus: a phase 2, randomised, double-blind, placebo-controlled trial. *Lancet Diabetes Endocrinol.* 2014 Feb;2(2):125-32. doi: 10.1016/S2213-8587(13)70149-9. Epub 2013 Nov 1. PMID: 24622716

SUPPLEMENTARY DATA

**Supplementary Appendix 5.** Clinical outcomes of the trials investigated

| Author, year               | Outcomes  |                                 |                               |                  |          |              |              |                     |  |
|----------------------------|-----------|---------------------------------|-------------------------------|------------------|----------|--------------|--------------|---------------------|--|
|                            | HbA1c (%) | Fasting plasma glucose (mmol/l) | 2hr postmeal glucose (mmol/l) | Body weight (kg) | Diarrhea | Pancreatitis | Hypoglycemia | Severe hypoglycemia |  |
| <b>Shanker 2017 (1)</b>    | A         | A                               | A                             | A                | NA       | A            | A            | A                   |  |
| <b>Gantz 2017 (2)</b>      | A         | A                               | A                             | A                | A        | A            | A            | A                   |  |
| <b>Chacra 2017 (3)</b>     | A         | A                               | NA                            | A                | NA       | A            | A            | A                   |  |
| <b>Goldenberg 2016 (4)</b> | A         | A                               | NA                            | A                | A        | A            | A            | A                   |  |
| <b>Sheu 2015 (5)</b>       | A         | A                               | A                             | A                | NA       | A            | A            | A                   |  |
| <b>Inagaki 2015 (6)</b>    | A         | A                               | A                             | A                | A        | A            | A            | A                   |  |
| <b>Inagaki 2014 (7)</b>    | A         | A                               | A                             | NA               | A        | A            | A            | A                   |  |

A; data available, NA; data not available

**Supplementary Appendix 6.** Incidence of events in the trials investigated

## 1. Achieving HbA1c &lt; 7.0%

| Author, year        | Weekly DPP-4is (n/N) | Daily DPP-4is (n/N) |
|---------------------|----------------------|---------------------|
| Gantz 2017 (2)      | (78/166)             | (62/165)            |
| Goldenberg 2016 (4) | (175/322)            | (168/320)           |
| Inagaki 2015 (6)    | (26/101)             | (30/92)             |

| Author, year     | Weekly DPP-4is (n/N) | Placebo (n/N) |
|------------------|----------------------|---------------|
| Shanker 2017 (1) | (76/201)             | (38/201)      |
| Gantz 2017 (2)   | (78/166)             | (6/83)        |
| Chacra 2017 (3)  | (107/29)             | (106/20)      |
| Sheu 2015 (5)    | (38/114)             | (25/114)      |
| Inagaki 2015 (6) | (26/101)             | (2/50)        |
| Inagaki 2014 (7) | (18/54)              | (0/55)        |

## 2. Diarrhea

| Author, year        | Weekly DPP-4is (n/N) | Daily DPP-4is (n/N) |
|---------------------|----------------------|---------------------|
| Gantz 2017 (2)      | (2/166)              | (3/165)             |
| Goldenberg 2016 (4) | (3/322)              | (9/320)             |
| Inagaki 2015 (6)    | (2/101)              | (3/92)              |

| Author, year     | Weekly DPP-4is (n/N) | Placebo (n/N) |
|------------------|----------------------|---------------|
| Gantz 2017 (2)   | (2/166)              | (3/83)        |
| Inagaki 2015 (6) | (2/101)              | (1/50)        |
| Inagaki 2014 (7) | (1/54)               | (0/55)        |

## 3. Pancreatitis

| Author, year        | Weekly DPP-4is (n/N) | Daily DPP-4is (n/N) |
|---------------------|----------------------|---------------------|
| Gantz 2017 (2)      | (0/166)              | (0/165)             |
| Goldenberg 2016 (4) | (0/322)              | (0/320)             |
| Inagaki 2015 (6)    | (0/101)              | (0/92)              |

| Author, year     | Weekly DPP-4is (n/N) | Placebo (n/N) |
|------------------|----------------------|---------------|
| Shanker 2017 (1) | (0/201)              | (1/201)       |
| Gantz 2017 (2)   | (0/166)              | (0/83)        |
| Chacra 2017 (3)  | (0/107)              | (0/106)       |
| Sheu 2015 (5)    | (0/114)              | (0/114)       |
| Inagaki 2015 (6) | (0/101)              | (0/50)        |
| Inagaki 2014 (7) | (0/54)               | (0/55)        |

SUPPLEMENTARY DATA

4. Severe hypoglycemia

| Author, year        | Weekly DPP-4is (n/N) | Daily DPP-4is (n/N) |
|---------------------|----------------------|---------------------|
| Gantz 2017 (2)      | (0/166)              | (0/165)             |
| Goldenberg 2016 (4) | (0/322)              | (0/320)             |
| Inagaki 2015 (6)    | (0/101)              | (0/92)              |

| Author, year     | Weekly DPP-4is (n/N) | Placebo (n/N) |
|------------------|----------------------|---------------|
| Shanker 2017 (1) | (1/201)              | (2/201)       |
| Gantz 2017 (2)   | (0/166)              | (0/83)        |
| Chacra 2017 (3)  | (6/107)              | (8/106)       |
| Sheu 2015 (5)    | (0/114)              | (0/114)       |
| Inagaki 2015 (6) | (0/101)              | (0/50)        |
| Inagaki 2014 (7) | (0/54)               | (0/55)        |

5. Hypoglycemia

| Author, year        | Weekly DPP-4is (n/N) | Daily DPP-4is (n/N) |
|---------------------|----------------------|---------------------|
| Gantz 2017 (2)      | (0/166)              | (1/165)             |
| Goldenberg 2016 (4) | (12/322)             | (15/320)            |
| Inagaki 2015 (6)    | (0/101)              | (1/92)              |

| Author, year     | Weekly DPP-4is (n/N) | Placebo (n/N) |
|------------------|----------------------|---------------|
| Shanker 2017 (1) | (7/201)              | (5/201)       |
| Gantz 2017 (2)   | (0/166)              | (0/83)        |
| Chacra 2017 (3)  | (22/107)             | (19/106)      |
| Sheu 2015 (5)    | (0/114)              | (3/114)       |
| Inagaki 2015 (6) | (0/101)              | (0/50)        |
| Inagaki 2014 (7) | (0/54)               | (0/55)        |



SUPPLEMENTARY DATA

**Supplementary Appendix 7. Risk of bias**

| <b>Study</b>        | <b>Random Sequence Generation</b> | <b>Allocation Concealment</b> | <b>Blinding of Participants and Personnel</b> | <b>Blinding of Outcome Assessment</b> | <b>Incomplete Outcome Data</b> | <b>Selective Reporting</b> | <b>Sponsorship bias</b> | <b>Other bias</b> |
|---------------------|-----------------------------------|-------------------------------|-----------------------------------------------|---------------------------------------|--------------------------------|----------------------------|-------------------------|-------------------|
| Shanker 2017 (1)    | U                                 | U                             | L                                             | U                                     | L                              | U                          | H                       | L                 |
| Gantz 2017 (2)      | U                                 | U                             | L                                             | U                                     | L                              | U                          | H                       | L                 |
| Chacra 2017 (3)     | U                                 | U                             | L                                             | U                                     | L                              | U                          | H                       | L                 |
| Goldenberg 2016 (4) | U                                 | U                             | L                                             | U                                     | L                              | U                          | H                       | L                 |
| Sheu 2015 (5)       | U                                 | U                             | L                                             | U                                     | L                              | U                          | H                       | L                 |
| Inagaki 2015 (6)    | L                                 | L                             | L                                             | L                                     | L                              | U                          | H                       | L                 |
| Inagaki 2014 (7)    | L                                 | L                             | L                                             | L                                     | L                              | U                          | H                       | L                 |

L = Low Risk; H = High Risk; U = Unclear Risk.

SUPPLEMENTARY DATA

**Supplementary Appendix 8. Meta-analysis comparing weekly DPP-4is with placebo for type 2 diabetes**

**A. HbA1c (%)**

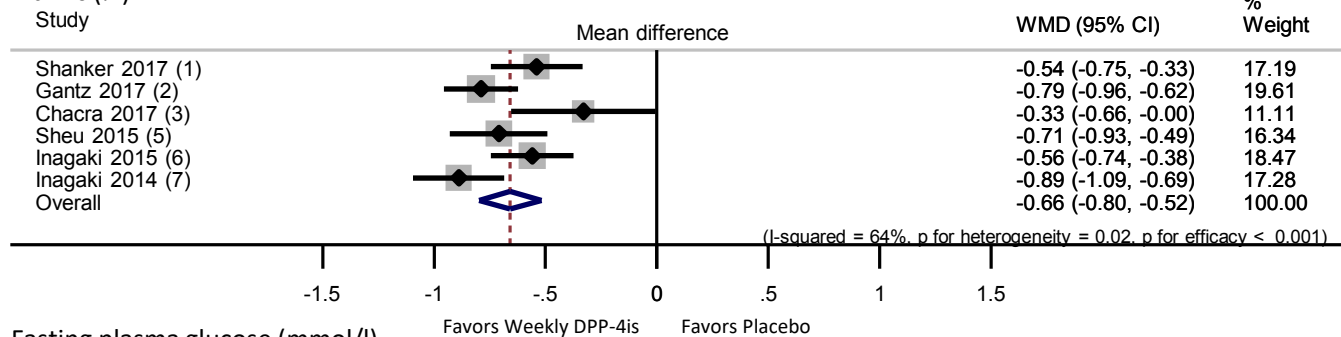

**B. Fasting plasma glucose (mmol/l)**

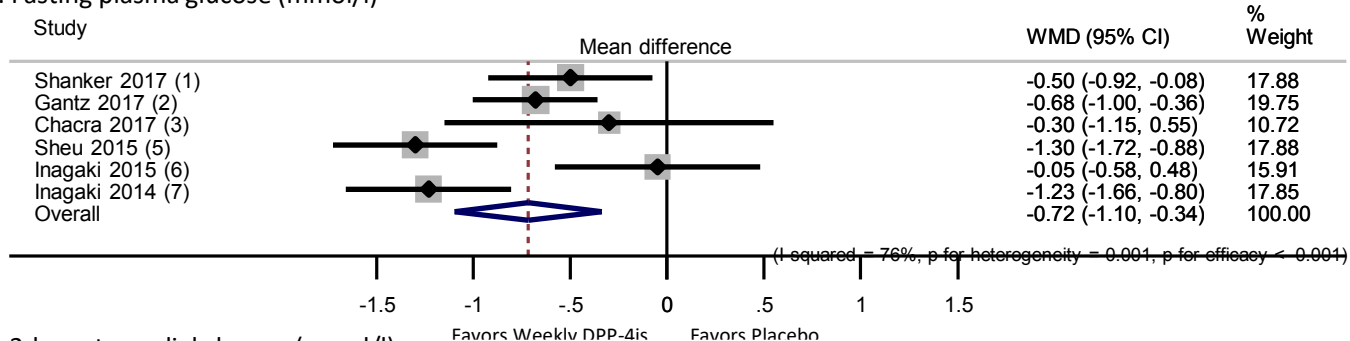

**C. 2-h postprandial glucose (mmol/l)**

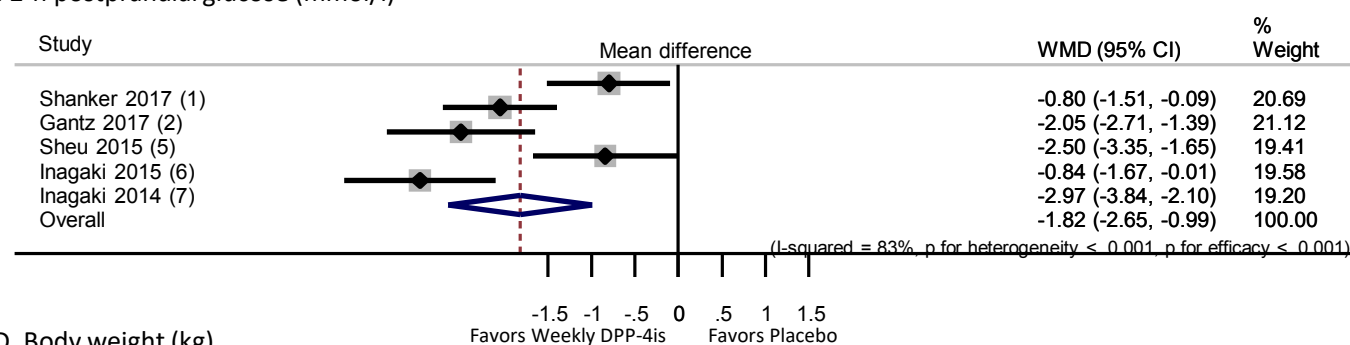

**D. Body weight (kg)**

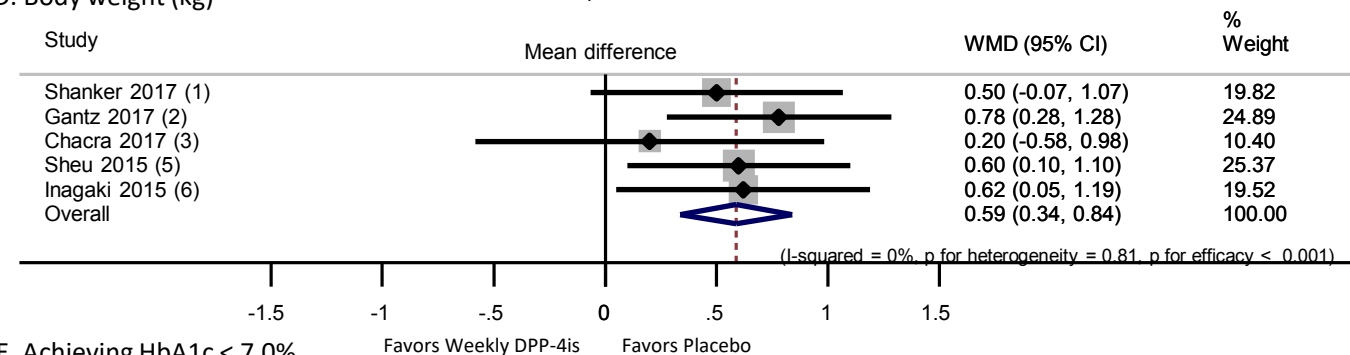

**E. Achieving HbA1c < 7.0%**

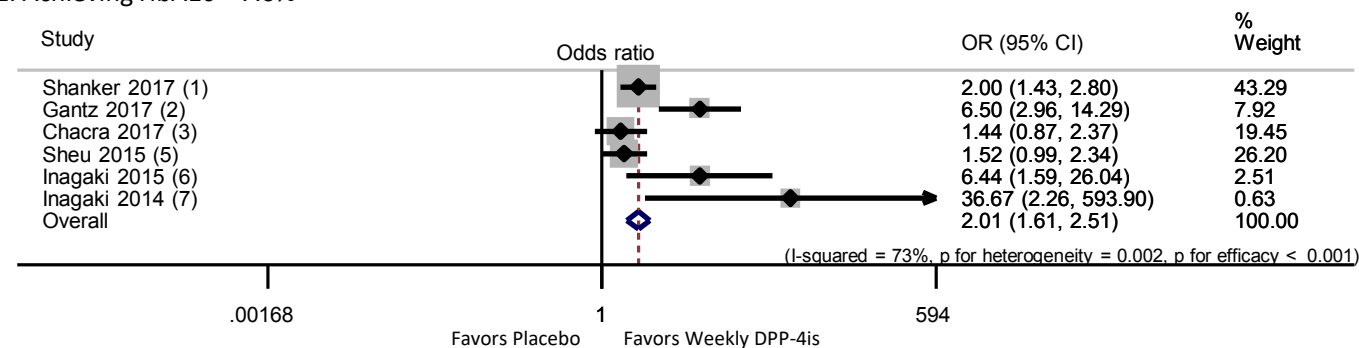

DPP-4i; dipeptidyl peptidase-4 inhibitor, CI; confidence interval, WMD; weighted mean difference, OR; odds ratio. Reference list is in Appendix 4.

**SUPPLEMENTARY DATA**

**Supplementary Appendix 8 (continued).** Meta-analysis comparing weekly DPP-4is with placebo for type 2 diabetes

**F. Diarrhea**

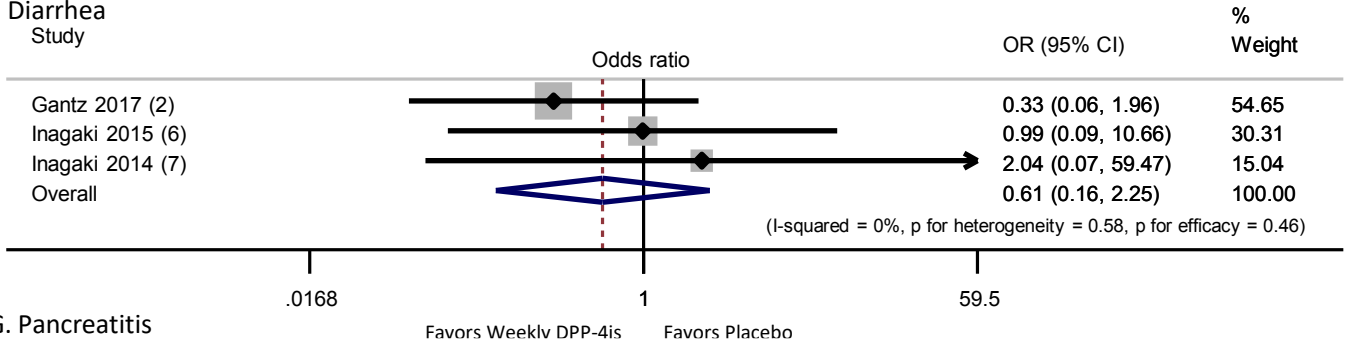

**G. Pancreatitis**

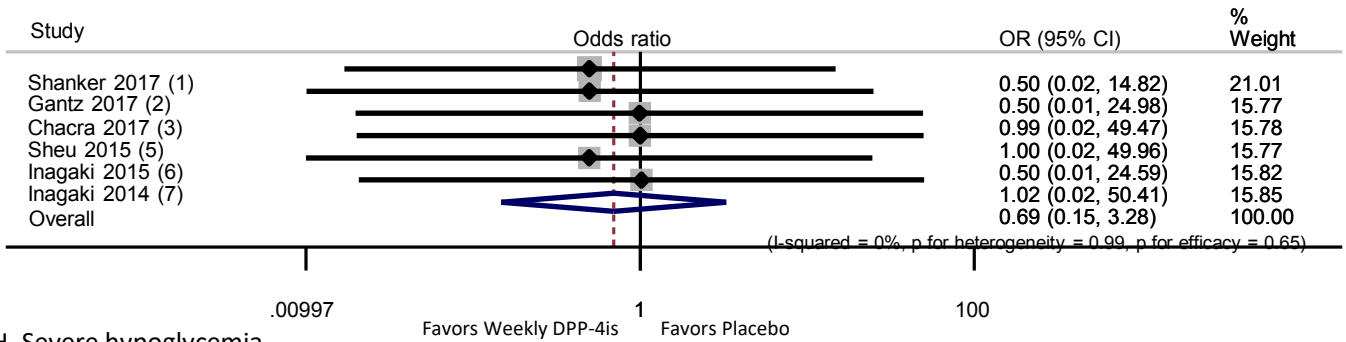

**H. Severe hypoglycemia**

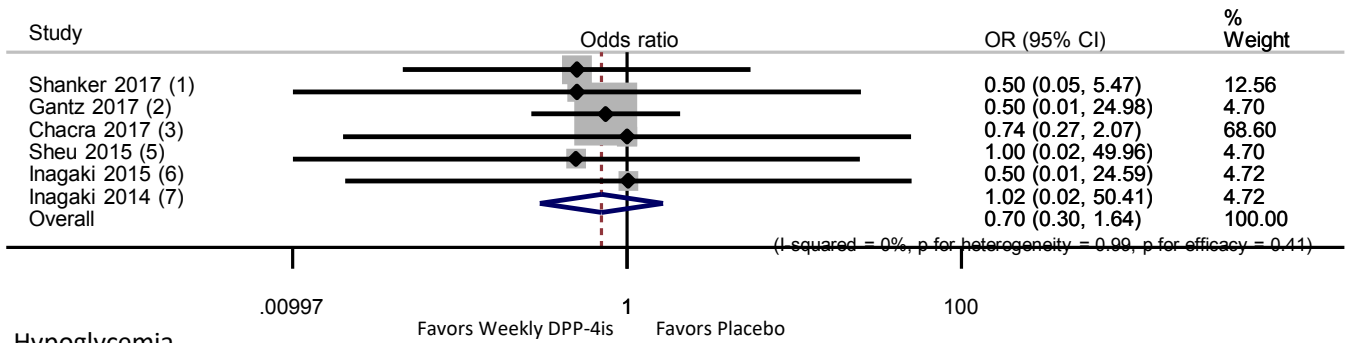

**I. Hypoglycemia**

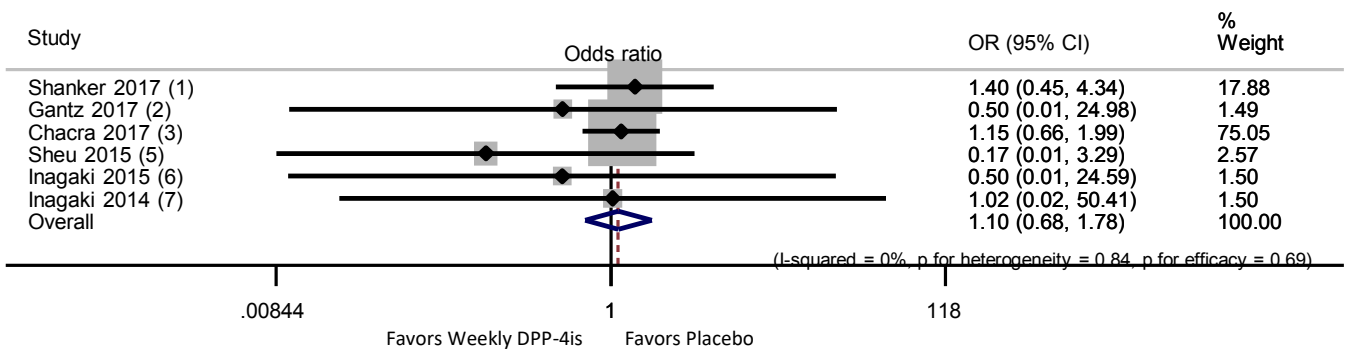

DPP-4i; dipeptidyl peptidase-4 inhibitor, CI; confidence interval, WMD; weighted mean difference, OR; odds ratio. The OR was employed as a measure of effect for dichotomous variables. When performing meta-analysis, we added 0.5 if no events were reported in the treatment group of a study. Reference list is in Appendix 4.S

# SUPPLEMENTARY DATA

## Supplementary Appendix 9. Funnel plots and the results of Begg's test and Egger's test

### A. Diarrhea

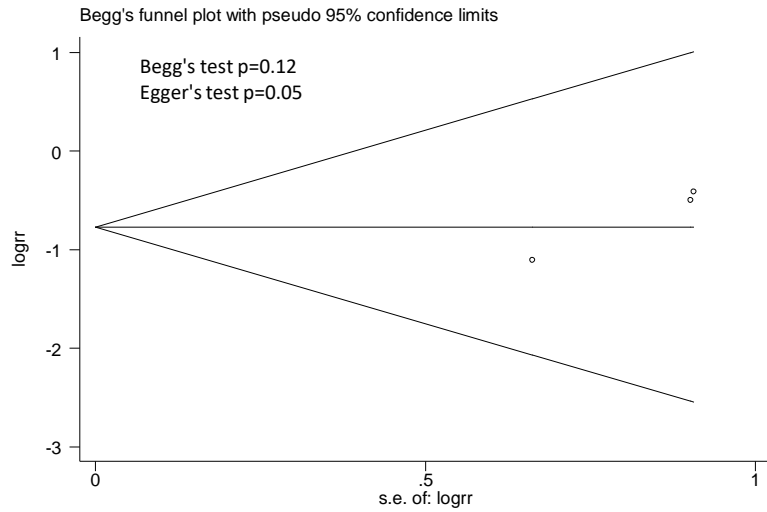

### B. Pancreatitis

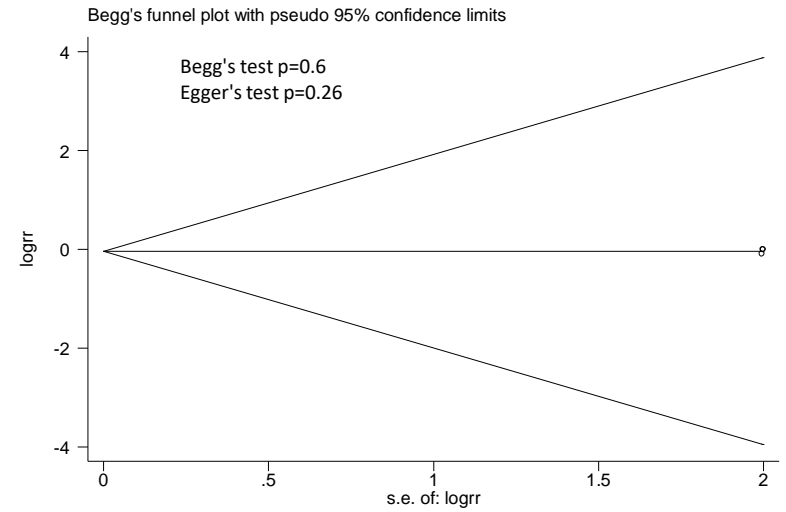

### C. Severe hypoglycemia

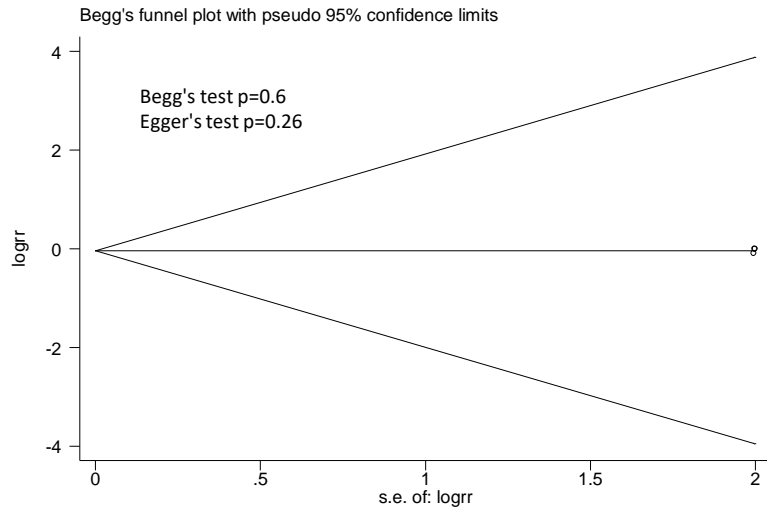

### D. Hypoglycemia

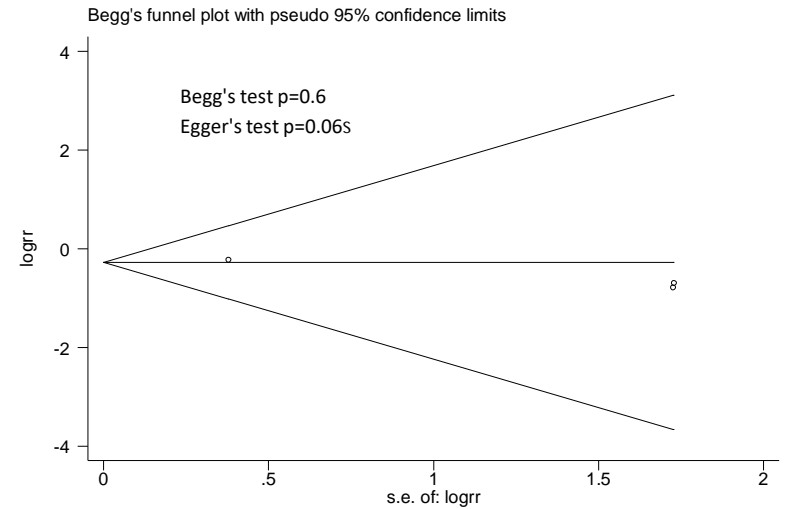

Supplement: dc172095supplementarydata.pdf [file dc172095supplementarydata.pdf]
